# Supplementary material for: The Undergraduate Research Student Self-Assessment (URSSA): Validation for Use in Program Evaluation
Source: Atypon-hosted journal article supplement (doi:10.1187/cbe.14-11-0206), 2015-08-06
Supplement: combinedsupmats.pdf [file combinedsupmats.pdf]

# Supplemental Material

*CBE—Life Sciences Education*

Weston *et al.*

Appendix 1

Table 6 Standardized factor loadings, mean and standard deviations for five-factor model

| Factor                                | Item | Question                                                           | Standardized Factor loading | Mean | SD  |
|---------------------------------------|------|--------------------------------------------------------------------|-----------------------------|------|-----|
| Thinking and Working Like a Scientist | Q1   | Analyzing data for patterns.                                       | .50                         | 3.4  | 1.2 |
|                                       | Q2   | Figuring out the next step in a research project.                  | .60                         | 3.8  | 1.0 |
|                                       | Q3   | Problem-solving in general.                                        | .56                         | 3.7  | .9  |
|                                       | Q4   | Formulating a research question that could be answered with data.  | .59                         | 3.4  | 1.1 |
|                                       | Q5   | Identifying limitations of research methods and designs.           | .48                         | 3.8  | 1.0 |
|                                       | Q6   | Understanding the theory and concepts guiding my research project. | .55                         | 4.1  | 1.0 |
|                                       | Q7   | Understanding the connections among scientific disciplines.        | .56                         | 3.5  | 1.1 |
|                                       | Q8   | Understanding the relevance of research to my coursework.          | .52                         | 3.5  | 1.1 |
|                                       |      |                                                                    |                             |      |     |
| Personal and Professional Gains       | Q9   | Confidence in my ability to do research.                           | .63                         | 3.8  | 1.0 |
|                                       | Q10  | Comfort in working collaboratively with others.                    | .61                         | 3.6  | 1.1 |
|                                       | Q11  | Confidence in my ability to do well in future science courses.     | .60                         | 3.5  | 1.1 |
|                                       | Q12  | Ability to work independently.                                     | .50                         | 3.8  | 1.1 |
|                                       | Q13  | Understanding what everyday research work is like.                 | .52                         | 4.2  | 1.0 |
|                                       | Q14  | Taking greater care in conducting procedures in the lab or field.  | .56                         | 3.8  | 1.1 |
|                                       | Q15  | Developing patience with the slow pace of research.                | .49                         | 3.6  | 1.1 |
|                                       |      |                                                                    |                             |      |     |
| Skills                                | Q16  | Writing scientific reports or papers.                              | .47                         | 3.0  | 1.2 |
|                                       | Q17  | Making oral presentations.                                         | .62                         | 3.5  | 1.1 |
|                                       | Q18  | Defending an argument when asked questions.                        | .56                         | 3.0  | 1.1 |
|                                       | Q19  | Explaining my project to people outside my field.                  | .59                         | 3.8  | 1.0 |
|                                       | Q20  | Preparing a scientific poster.                                     | .45                         | 3.6  | 1.4 |
|                                       | Q21  | Keeping a detailed lab notebook.                                   | .44                         | 3.0  | 1.2 |
|                                       | Q22  | Conducting observations in the lab or field.                       | .53                         | 3.3  | 1.1 |
|                                       | Q25  | Understanding journal articles.                                    | .59                         | 2.6  | 1.3 |
|                                       | Q26  | Conducting database or internet searches.                          | .44                         | 2.5  | 1.2 |
|                                       | Q27  | Managing my time.                                                  | .46                         | 3.1  | 1.1 |

(Table 6 cont.)

| Factor                  | Item | Question                                                      | St. Factor loading | Mean | SD  |
|-------------------------|------|---------------------------------------------------------------|--------------------|------|-----|
| Attitudes and Behaviors | Q28  | Engage in real-world science research                         | .59                | 4.3  | .9  |
|                         | Q29  | Feel like a scientist.                                        | .68                | 4.0  | 1.0 |
|                         | Q30  | Think creatively about the project.                           | .62                | 3.7  | 1.0 |
|                         | Q31  | Try out new ideas or procedures on your own.                  | .40                | 3.2  | 1.4 |
|                         | Q32  | Feel responsible for the project.                             | .54                | 4.1  | 1.1 |
|                         | Q33  | Work extra hours because you were excited about the research. | .54                | 3.4  | 1.3 |
|                         | Q35  | Feel a part of a scientific community.                        | .52                | 3.7  | 1.3 |
|                         |      |                                                               |                    |      |     |
| Satisfaction            | Q36  | My working relationship with my research mentor               | .57                | 4.1  | 1.1 |
|                         | Q37  | My working relationship with research group members.          | .55                | 4.1  | 1.1 |
|                         | Q38  | The amount of time I spent doing meaningful research.         | .69                | 3.9  | .9  |
|                         | Q39  | The amount of time I spent with my research mentor.           | .59                | 3.7  | 1.1 |
|                         | Q40  | The research experience overall.                              | .85                | 4.2  | .8  |

*Note:* Based on first sample n = 506. Ratings from 1 – 5.

*Note:* Q23, Q24, Q34 left out of analysis due to large amount of missing data from “non-applicable” option.

*Note:* Standardized factor loadings Q1 – Q35 from four factor model, Q36 – Q40 from 5 factor model.

|      | Q1   | Q2    | Q3   | Q4   | Q5    | Q6    | Q7    | Q8    | Q9    | Q10   | Q11   | Q12  | Q13   | Q14   | Q15  | Q16  | Q17   | Q18   | Q19  | Q20  |
|------|------|-------|------|------|-------|-------|-------|-------|-------|-------|-------|------|-------|-------|------|------|-------|-------|------|------|
| Q1   | 1.00 |       |      |      |       |       |       |       |       |       |       |      |       |       |      |      |       |       |      |      |
| Q2   | 0.34 | 1.00  |      |      |       |       |       |       |       |       |       |      |       |       |      |      |       |       |      |      |
| Q3   | 0.28 | 0.44  | 1.00 |      |       |       |       |       |       |       |       |      |       |       |      |      |       |       |      |      |
| Q4   | 0.34 | 0.39  | 0.39 | 1.00 |       |       |       |       |       |       |       |      |       |       |      |      |       |       |      |      |
| Q5   | 0.19 | 0.31  | 0.30 | 0.38 | 1.00  |       |       |       |       |       |       |      |       |       |      |      |       |       |      |      |
| Q6   | 0.18 | 0.32  | 0.22 | 0.25 | 0.33  | 1.00  |       |       |       |       |       |      |       |       |      |      |       |       |      |      |
| Q7   | 0.32 | 0.27  | 0.27 | 0.29 | 0.26  | 0.35  | 1.00  |       |       |       |       |      |       |       |      |      |       |       |      |      |
| Q8   | 0.27 | 0.24  | 0.20 | 0.28 | 0.15  | 0.35  | 0.45  | 1.00  |       |       |       |      |       |       |      |      |       |       |      |      |
| Q9   | 0.25 | 0.31  | 0.24 | 0.27 | 0.13  | 0.29  | 0.25  | 0.25  | 1.00  |       |       |      |       |       |      |      |       |       |      |      |
| Q10  | 0.26 | 0.20  | 0.20 | 0.19 | 0.20  | 0.34  | 0.28  | 0.27  | 0.46  | 1.00  |       |      |       |       |      |      |       |       |      |      |
| Q11  | 0.25 | 0.15  | 0.14 | 0.19 | 0.10  | 0.21  | 0.25  | 0.27  | 0.44  | 0.42  | 1.00  |      |       |       |      |      |       |       |      |      |
| Q12  | 0.24 | 0.22  | 0.19 | 0.18 | 0.11  | 0.16  | 0.16  | 0.19  | 0.31  | 0.22  | 0.40  | 1.00 |       |       |      |      |       |       |      |      |
| Q13  | 0.19 | 0.15  | 0.19 | 0.20 | 0.15  | 0.23  | 0.25  | 0.27  | 0.30  | 0.26  | 0.25  | 0.23 | 1.00  |       |      |      |       |       |      |      |
| Q14  | 0.22 | 0.21  | 0.25 | 0.24 | 0.27  | 0.24  | 0.26  | 0.33  | 0.25  | 0.27  | 0.27  | 0.20 | 0.44  | 1.00  |      |      |       |       |      |      |
| Q15  | 0.14 | 0.17  | 0.27 | 0.14 | 0.16  | 0.15  | 0.12  | 0.24  | 0.22  | 0.23  | 0.30  | 0.35 | 0.36  | 0.35  | 1.00 |      |       |       |      |      |
| Q16  | 0.24 | 0.20  | 0.18 | 0.17 | 0.18  | 0.17  | 0.13  | 0.12  | 0.18  | 0.18  | 0.15  | 0.14 | 0.11  | 0.22  | 0.09 | 1.00 |       |       |      |      |
| Q17  | 0.20 | 0.18  | 0.17 | 0.20 | 0.17  | 0.32  | 0.32  | 0.28  | 0.17  | 0.30  | 0.15  | 0.16 | 0.25  | 0.30  | 0.14 | 0.37 | 1.00  |       |      |      |
| Q18  | 0.22 | 0.19  | 0.22 | 0.26 | 0.21  | 0.26  | 0.24  | 0.15  | 0.15  | 0.28  | 0.18  | 0.12 | 0.11  | 0.19  | 0.08 | 0.32 | 0.52  | 1.00  |      |      |
| Q19  | 0.20 | 0.19  | 0.24 | 0.18 | 0.18  | 0.28  | 0.23  | 0.19  | 0.20  | 0.31  | 0.19  | 0.21 | 0.21  | 0.27  | 0.23 | 0.29 | 0.41  | 0.44  | 1.00 |      |
| Q20  | 0.04 | 0.19  | 0.14 | 0.15 | 0.12  | 0.28  | 0.20  | 0.19  | 0.21  | 0.21  | 0.21  | 0.14 | 0.23  | 0.24  | 0.16 | 0.27 | 0.33  | 0.24  | 0.33 | 1.00 |
| Q21  | 0.08 | 0.18  | 0.20 | 0.14 | 0.10  | 0.14  | 0.11  | 0.17  | 0.18  | 0.14  | 0.21  | 0.14 | 0.23  | 0.40  | 0.15 | 0.18 | 0.23  | 0.18  | 0.20 | 0.23 |
| Q22  | 0.25 | 0.24  | 0.24 | 0.26 | 0.19  | 0.22  | 0.26  | 0.28  | 0.27  | 0.28  | 0.29  | 0.21 | 0.31  | 0.45  | 0.18 | 0.21 | 0.27  | 0.26  | 0.24 | 0.26 |
| Q23  | 0.44 | 0.14  | 0.03 | 0.20 | 0.09  | 0.12  | 0.20  | 0.16  | 0.17  | 0.13  | 0.15  | 0.09 | 0.11  | 0.15  | 0.07 | 0.16 | 0.17  | 0.19  | 0.16 | 0.17 |
| Q24  | 0.21 | 0.12  | 0.09 | 0.10 | 0.09  | 0.15  | 0.20  | 0.17  | 0.08  | 0.07  | 0.17  | 0.12 | 0.12  | 0.27  | 0.09 | 0.10 | 0.12  | 0.10  | 0.11 | 0.11 |
| Q25  | 0.29 | 0.24  | 0.23 | 0.28 | 0.14  | 0.25  | 0.28  | 0.27  | 0.25  | 0.21  | 0.20  | 0.29 | 0.22  | 0.28  | 0.20 | 0.25 | 0.34  | 0.26  | 0.29 | 0.21 |
| Q26  | 0.17 | 0.15  | 0.13 | 0.17 | 0.01  | 0.17  | 0.14  | 0.23  | 0.09  | 0.17  | 0.16  | 0.18 | 0.12  | 0.11  | 0.17 | 0.22 | 0.20  | 0.19  | 0.24 | 0.17 |
| Q27  | 0.15 | 0.21  | 0.17 | 0.17 | 0.06  | 0.16  | 0.07  | 0.17  | 0.22  | 0.17  | 0.28  | 0.29 | 0.26  | 0.30  | 0.37 | 0.16 | 0.22  | 0.14  | 0.25 | 0.18 |
| Q28  | 0.19 | 0.27  | 0.23 | 0.25 | 0.16  | 0.26  | 0.19  | 0.15  | 0.30  | 0.27  | 0.14  | 0.05 | 0.10  | 0.13  | 0.06 | 0.10 | 0.13  | 0.14  | 0.16 | 0.13 |
| Q29  | 0.16 | 0.25  | 0.22 | 0.20 | 0.14  | 0.22  | 0.14  | 0.17  | 0.42  | 0.31  | 0.25  | 0.18 | 0.16  | 0.24  | 0.19 | 0.12 | 0.16  | 0.16  | 0.13 | 0.20 |
| Q30  | 0.12 | 0.29  | 0.17 | 0.28 | 0.14  | 0.23  | 0.11  | 0.14  | 0.27  | 0.23  | 0.13  | 0.18 | -0.02 | 0.06  | 0.11 | 0.13 | 0.06  | 0.17  | 0.20 | 0.13 |
| Q31  | 0.05 | 0.19  | 0.11 | 0.19 | 0.09  | 0.03  | -0.04 | -0.03 | -0.01 | -0.05 | -0.05 | 0.12 | -0.13 | -0.10 | 0.01 | 0.02 | -0.05 | -0.02 | 0.02 | 0.03 |
| Q32  | 0.16 | 0.28  | 0.20 | 0.18 | 0.16  | 0.18  | 0.07  | 0.09  | 0.18  | 0.10  | 0.08  | 0.22 | -0.01 | 0.05  | 0.09 | 0.12 | 0.01  | 0.00  | 0.07 | 0.09 |
| Q33  | 0.10 | 0.21  | 0.14 | 0.19 | 0.13  | 0.17  | 0.10  | 0.13  | 0.20  | 0.16  | 0.14  | 0.20 | 0.08  | 0.14  | 0.19 | 0.06 | 0.08  | 0.06  | 0.05 | 0.09 |
| Q34  | 0.00 | -0.04 | 0.00 | 0.01 | -0.01 | -0.01 | -0.04 | 0.01  | 0.17  | 0.01  | 0.05  | 0.03 | 0.07  | 0.12  | 0.03 | 0.01 | 0.08  | 0.04  | 0.04 | 0.02 |
| Q35  | 0.14 | 0.16  | 0.16 | 0.15 | 0.11  | 0.19  | 0.16  | 0.15  | 0.30  | 0.25  | 0.18  | 0.03 | 0.13  | 0.21  | 0.09 | 0.17 | 0.17  | 0.24  | 0.13 | 0.20 |
| Q36  | 0.12 | 0.21  | 0.16 | 0.14 | 0.10  | 0.22  | 0.12  | 0.14  | 0.26  | 0.21  | 0.14  | 0.02 | 0.13  | 0.11  | 0.10 | 0.09 | 0.06  | 0.12  | 0.01 | 0.06 |
| Q37  | 0.19 | 0.23  | 0.24 | 0.22 | 0.16  | 0.19  | 0.17  | 0.11  | 0.18  | 0.27  | 0.14  | 0.06 | 0.13  | 0.17  | 0.02 | 0.11 | 0.07  | 0.08  | 0.01 | 0.17 |
| Q38  | 0.19 | 0.25  | 0.19 | 0.19 | 0.10  | 0.22  | 0.16  | 0.15  | 0.30  | 0.22  | 0.19  | 0.13 | 0.13  | 0.18  | 0.19 | 0.14 | 0.07  | 0.12  | 0.12 | 0.16 |
| Q39  | 0.15 | 0.21  | 0.15 | 0.16 | 0.11  | 0.18  | 0.12  | 0.11  | 0.15  | 0.11  | 0.10  | 0.07 | 0.05  | 0.07  | 0.04 | 0.08 | 0.10  | 0.15  | 0.08 | 0.12 |
| (Q40 | 0.26 | 0.31  | 0.21 | 0.23 | 0.18  | 0.33  | 0.24  | 0.20  | 0.39  | 0.25  | 0.28  | 0.18 | 0.19  | 0.17  | 0.14 | 0.18 | 0.14  | 0.15  | 0.13 | 0.22 |

(Table 8 cont.)

|     | Q21   | Q22   | Q23   | Q24   | Q25  | Q26   | Q27   | Q28  | Q29  | Q30  | Q31  | Q32  | Q33  | Q34  | Q35  | Q36  | Q37  | Q38  | Q39  | Q40  |
|-----|-------|-------|-------|-------|------|-------|-------|------|------|------|------|------|------|------|------|------|------|------|------|------|
| Q21 | 1.00  |       |       |       |      |       |       |      |      |      |      |      |      |      |      |      |      |      |      |      |
| Q22 | 0.43  | 1.00  |       |       |      |       |       |      |      |      |      |      |      |      |      |      |      |      |      |      |
| Q23 | 0.05  | 0.22  | 1.00  |       |      |       |       |      |      |      |      |      |      |      |      |      |      |      |      |      |
| Q24 | 0.23  | 0.32  | 0.22  | 1.00  |      |       |       |      |      |      |      |      |      |      |      |      |      |      |      |      |
| Q25 | 0.24  | 0.27  | 0.19  | 0.17  | 1.00 |       |       |      |      |      |      |      |      |      |      |      |      |      |      |      |
| Q26 | 0.14  | 0.13  | 0.22  | 0.07  | 0.52 | 1.00  |       |      |      |      |      |      |      |      |      |      |      |      |      |      |
| Q27 | 0.29  | 0.28  | 0.07  | 0.18  | 0.33 | 0.24  | 1.00  |      |      |      |      |      |      |      |      |      |      |      |      |      |
| Q28 | 0.07  | 0.18  | 0.07  | -0.01 | 0.15 | 0.09  | 0.02  | 1.00 |      |      |      |      |      |      |      |      |      |      |      |      |
| Q29 | 0.15  | 0.21  | 0.01  | 0.06  | 0.15 | 0.08  | 0.13  | 0.55 | 1.00 |      |      |      |      |      |      |      |      |      |      |      |
| Q30 | -0.01 | 0.13  | 0.01  | 0.03  | 0.07 | 0.03  | 0.11  | 0.29 | 0.37 | 1.00 |      |      |      |      |      |      |      |      |      |      |
| Q31 | -0.09 | -0.07 | -0.05 | -0.07 | 0.01 | 0.05  | -0.04 | 0.12 | 0.12 | 0.49 | 1.00 |      |      |      |      |      |      |      |      |      |
| Q32 | 0.00  | 0.05  | 0.03  | 0.02  | 0.08 | 0.07  | 0.05  | 0.25 | 0.28 | 0.41 | 0.43 | 1.00 |      |      |      |      |      |      |      |      |
| Q33 | 0.07  | 0.14  | -0.07 | 0.01  | 0.10 | 0.01  | 0.11  | 0.25 | 0.31 | 0.38 | 0.32 | 0.39 | 1.00 |      |      |      |      |      |      |      |
| Q34 | -0.01 | 0.01  | 0.04  | -0.13 | 0.03 | -0.05 | -0.02 | 0.17 | 0.21 | 0.07 | 0.01 | 0.04 | 0.15 | 1.00 |      |      |      |      |      |      |
| Q35 | 0.04  | 0.15  | 0.09  | 0.03  | 0.17 | 0.09  | 0.06  | 0.38 | 0.48 | 0.25 | 0.09 | 0.18 | 0.28 | 0.38 | 1.00 |      |      |      |      |      |
| Q36 | 0.00  | 0.06  | -0.01 | 0.14  | 0.03 | -0.02 | 0.07  | 0.19 | 0.22 | 0.20 | 0.01 | 0.21 | 0.19 | 0.12 | 0.25 | 1.00 |      |      |      |      |
| Q37 | 0.02  | 0.18  | 0.09  | 0.18  | 0.10 | -0.01 | 0.02  | 0.25 | 0.28 | 0.22 | 0.12 | 0.18 | 0.16 | 0.02 | 0.23 | 0.36 | 1.00 |      |      |      |
| Q38 | 0.12  | 0.20  | 0.11  | 0.13  | 0.12 | 0.00  | 0.15  | 0.36 | 0.43 | 0.27 | 0.07 | 0.29 | 0.33 | 0.08 | 0.29 | 0.32 | 0.30 | 1.00 |      |      |
| Q39 | -0.05 | 0.03  | 0.12  | 0.04  | 0.05 | 0.01  | 0.04  | 0.26 | 0.22 | 0.19 | 0.05 | 0.14 | 0.13 | 0.09 | 0.25 | 0.40 | 0.41 | 0.43 | 1.00 |      |
| Q40 | 0.06  | 0.13  | 0.13  | 0.15  | 0.14 | 0.04  | 0.14  | 0.37 | 0.41 | 0.34 | 0.11 | 0.32 | 0.30 | 0.12 | 0.31 | 0.50 | 0.46 | 0.60 | 0.48 | 1.00 |

(Key for table 8)

|     |                                                                    |     |                                                               |
|-----|--------------------------------------------------------------------|-----|---------------------------------------------------------------|
| Q1  | Analyzing data for patterns.                                       | Q21 | Keeping a detailed lab notebook.                              |
| Q2  | Figuring out the next step in a research project.                  | Q22 | Conducting observations in the lab or field.                  |
| Q3  | Problem-solving in general.                                        | Q23 | Using statistics to analyze data.                             |
| Q4  | Formulating a research question that could be answered with data.  | Q24 | Calibrating instruments needed for measurement.               |
| Q5  | Identifying limitations of research methods and designs.           | Q25 | Understanding journal articles.                               |
| Q6  | Understanding the theory and concepts guiding my research project. | Q26 | Conducting database or internet searches.                     |
| Q7  | Understanding the connections among scientific disciplines.        | Q27 | Managing my time.                                             |
| Q8  | Understanding the relevance of research to my coursework.          | Q28 | Engage in real-world science research                         |
| Q9  | Confidence in my ability to do research.                           | Q29 | Feel like a scientist.                                        |
| Q10 | Comfort in working collaboratively with others.                    | Q30 | Think creatively about the project.                           |
| Q11 | Confidence in my ability to do well in future science courses.     | Q31 | Try out new ideas or procedures on your own.                  |
| Q12 | Ability to work independently.                                     | Q32 | Feel responsible for the project.                             |
| Q13 | Understanding what everyday research work is like.                 | Q33 | Work extra hours because you were excited about the research. |
| Q14 | Taking greater care in conducting procedures in the lab or field.  | Q34 | Interact with scientists from outside your school.            |
| Q15 | Developing patience with the slow pace of research.                | Q35 | Feel a part of a scientific community.                        |
| Q16 | Writing scientific reports or papers.                              | Q36 | My working relationship with my research mentor               |
| Q17 | Making oral presentations.                                         | Q37 | My working relationship with research group members.          |
| Q18 | Defending an argument when asked questions.                        | Q38 | The amount of time I spent doing meaningful research.         |
| Q19 | Explaining my project to people outside my field.                  | Q39 | The amount of time I spent with my research mentor.           |
| Q20 | Preparing a scientific poster.                                     | Q40 | The research experience overall.                              |
